# Production of Activins by the Human Endosalpinx

A. O. BAHATHIQ, R. L. STEWART, M. WELLS, H. D. MOORE, A. A. PACEY, AND W. L. LEDGER

Section of Reproductive and Developmental Medicine, University of Sheffield, Royal Hallamshire Hospital (A.O.B., H.D.M., A.A.P., W.L.L.), Sheffield, United Kingdom S10 2SF; and Division of Genomic Medicine, Section of Oncology and Pathology, University of Sheffield Medical School (R.L.S., M.W.), Sheffield, United Kingdom S10 2RX

Uterine tubes from 11 premenopausal and 6 postmenopausal women were collected and examined for the presence of inhibin, activin, and follistatin in the endosalpinx. Immunocytochemistry of tissue from both the isthmic and ampullary regions demonstrated clear staining for the  $\beta_A$ - and  $\beta_B$ -subunits that increased in intensity from the isthmus to the ampulla. Staining for follistatin showed a similar pattern, but no staining for the  $\alpha$ -subunit was observed. Although staining for the  $\beta_A$ -subunit was seen in almost every epithelial cell, staining for the  $\beta_B$ -subunit was more variable. Western blotting showed a band with an apparent molecular mass of 28

kDa (corresponding to the activin dimer) and a band of approximately 60 kDa (corresponding to the pro-protein of activin). *In situ* hybridization confirmed the presence of mRNA for the  $\beta_A$ - and  $\beta_B$ -subunits in the endosalpinx. These results indicate that the endosalpinx is able to synthesize activin, not inhibin, suggesting that in premenopausal women they may have an important role in the biology of the developing embryo. The role in postmenopausal women is less certain, but could lead to the stimulation of FSH secretion by the pituitary gland or other autocrine/paracrine function within the uterine tube. (*J Clin Endocrinol Metab* 87: 5283–5289, 2002)

**I**NHIBINS AND ACTIVINS are dimeric glycoproteins that are defined by their actions on pituitary gonadotroph cells as either inhibiting (inhibins) or stimulating (activins) the production of FSH. They act through serine/threonine kinase transmembrane receptors, resulting in the phosphorylation of intracellular mediators, S-MAD (proteins related to the *Drosophila* gene mothers against deca-penta-plegic) (1). Follistatin (2) is recognized to be an important regulator of cellular differentiation and secretion through its potent ability to bind activins. The production of follistatin is, in turn, regulated by activin in the pituitary, gonads, and elsewhere (3). The inhibins and activins are members of the TGF $\beta$  superfamily and are known to have a variety of actions concerning hormonogenesis, cellular homeostasis, and differentiation in addition to their classical action on FSH. They also participate in fundamental development processes, including differentiation of embryonic mesoderm, neuronal protection, hemopoiesis, and reproductive function. Deletion or mutation of genes involved in the regulation of synthesis of inhibins and activins results in phenotypic abnormalities, including embryonic lethality, tumor formation, and infertility (4).

Inhibins and activins have been shown in a number of species to participate in the biology of both sperm (5) and oocyte (6) and in early embryonic development (7). Activin A has been shown to enhance postcleavage development of the bovine oocyte (8, 9) and to improve *in vitro* development of embryos in mouse (10) and bovine (8, 11). Inhibin is expressed in fetal testis throughout gestation in both ovine and bovine, with concentrations increasing toward term (12, 13). In the mouse, both  $\beta_A$ - and  $\beta_B$ -subunits are expressed in both oocytes and early preimplantation embryos and the oviduct (14), whereas the  $\alpha$ -subunit was not expressed in any of these, suggesting that mouse embryos produce activins, but

not inhibins, and activins appearing in the oviduct and in embryos are produced by the oviduct, oocytes, and embryos themselves (14). A recent study showed that neither activin  $\beta_A$  nor  $\beta_B$  mRNA was localized in any human or mouse oocyte, but it is highly expressed in the cumulus cells (15). In the human, the  $\alpha$ -,  $\beta_A$ -, and  $\beta_B$ -subunits are expressed in the testis (16), and inhibins, activins, and follistatin have been isolated from follicular fluid and identified in thecal and granulosa-lutein cells of the corpus luteum (17).

The uterine tube is the site of fertilization and early embryogenesis, and it seems likely that the inner epithelial lining of the uterine tube (the endosalpinx) is involved in the biology of gametes and early embryo, providing secretions into the tubal lumen that form the microenvironment of the gametes at the time of fertilization (18, 19). Although inhibins and activins have mostly been studied in the testis and ovary, early studies suggest that both the endosalpinx and the epididymal epithelium express inhibin/activin subunits (20, 21). We therefore decided to study the expression and localization of inhibin/activin subunits and follistatin in the human endosalpinx. Given the decline in circulating concentrations of inhibins A and B after the menopause, we also studied local expression of the  $\alpha$ - and  $\beta$ -subunits (and follistatin) in the uterine tubes from postmenopausal women.

## Materials and Methods

### Patient recruitment and surgery

Uterine tubes were obtained from women undergoing routine total abdominal hysterectomy at the Jessop Hospital for Women and the Northern General Hospital (Sheffield, UK). Before the operation, informed consent was obtained to perform unilateral or bilateral salpingectomy; these procedures were subject to control from the local ethics committee. Details of the surgical procedure and tissue handling arrangements were previously described (22), with all tissue samples arriving in the laboratory within 20 min of their removal from the patient. Uterine tubes from two groups of women were obtained. The first were women who had a regular menstrual cycle (between 25–35 d) and were of proven fertility, with no evidence of tubal disease and with

Abbreviations: SSC, Saline sodium citrate; TBS, Tris-buffered saline.

patent (unsterilized) tubes. Women who were taking drugs to control their menstrual cycle were specifically excluded from the study. The second group consisted of amenorrheic postmenopausal women, aged 55–65 yr, who had not received hormone replacement therapy for at least 2 yr before the time of surgery.

### Sampling and processing

For uterine tubes of premenopausal women, the isthmic and ampullary regions were identified, and a small section cut from each region. These were then further cut into two equal pieces, with one piece being fixed in 10% buffered formalin for immunocytochemistry and *in situ* hybridization (see below) and the second part being frozen in liquid nitrogen for Western blot analysis (see below). For the tubes of postmenopausal women, sections were cut from the isthmus and ampulla and fixed in 10% buffered formalin for immunocytochemistry only.

### Immunocytochemistry

The tissue samples prepared for immunocytochemistry were processed and embedded in wax according to methods described previously (23). Histological sections of 1 and 5  $\mu\text{m}$  thickness were then cut from the wax blocks and processed as described below.

An indirect avidin-biotin elite horseradish peroxidase technique was used to localize inhibin  $\alpha$ ,  $\beta_A$ , and  $\beta_B$ -subunits and follistatin following the protocol described. Briefly, sections were dewaxed, dehydrated in alcohol, and treated with 2% (vol/vol) hydrogen peroxide for 20 min in methanol to block endogenous peroxidase (24). Sections were pretreated in an 850-watt domestic microwave oven in 0.01 M citrate buffers twice for 5 min each time. The sections were incubated for 30 min with normal horse serum and then incubated with the primary antibodies overnight at 4 C. The following day, the section were washed with 20 mM PBS and then incubated with the secondary antibody for 30 min. After a further wash step, the sections were incubated with the avidin-biotin peroxidase complex ELITE system (Vector Laboratories, Inc., Burlingame, CA) with 3,3'-diaminobenzidine (Vector Laboratories, Inc.) as the substrate. Sections were washed in tap water, counterstained with Gill's hematoxylin, then dehydrated in a series of graded ethanols, cleared in xylene, and mounted in piccolyte.

The sections were observed on a Labor Lux microscope (Leitz, Wetzlar, Germany) at a magnification of  $\times 400$ . A positive reaction was characterized by the presence of brown staining. Each section was examined by two observers who agreed on the intensity of the staining according to the following semiquantitative scale:  $-$ , negative;  $\pm$ , equivocally positive;  $+$ , weakly positive;  $2+$ , positive; and  $3+++$ , strongly positive. Representative sections were photographed using a Wild MPS 48/52 Photoautomat (Leica Corp., Heebbrug, Switzerland) at  $\times 250$  and  $\times 400$  magnification.

### Western immunoblot analysis

The frozen tissue ( $\sim 2$  g) was ground to a fine powder in liquid nitrogen using a mortar and pestle and cooled in liquid nitrogen, and the macerated tissue was then lysed in 500  $\mu\text{l}$  triple detergent lysis buffer [50 mM Tris-HCl (pH 8.0), 150 mM NaCl, 0.1% SDS, 0.5% sodium deoxycholate, and 1% Nonidet P-40] containing the enzyme inhibitors aprotinin (1  $\mu\text{g}/\text{ml}$ ), sodium orthovanadate (100 mM), and phenylmethylsulfonyl fluoride (100  $\mu\text{g}/\text{ml}$ ). Samples were aspirated with a syringe fitted with a 21-gauge needle, left on ice for 30 min, and centrifuged (17,900  $\times g$  for 10 min). Supernatants were collected and stored at  $-80$  C. Sample protein content was measured using a DC protein assay kit (Bio-Rad Laboratories, Inc., Richmond, CA) according to the manufacturer's directions. Samples were denatured at 95 C for 5 min in sodium dodecyl sulfate loading buffer containing 100 mM dithiothreitol. Equal amounts of protein (20  $\mu\text{g}$ ) were resolved by SDS-PAGE using a 4% stacking and 15% resolving gel. Protein was electroblotted using a semidry transfer method onto polyvinylidene fluoride microporous membrane (NEN Life Science Products, Boston, MA) in Tris/glycine buffer containing 10% methanol. Membranes were blocked overnight at 4 C in Tris-buffered saline (TBS) containing 5% nonfat milk, and 0.05% Tween 20 and then incubated with mouse antihuman inhibin  $\beta_B$  antibody (C5; 1:200 dilution) or mouse antihuman inhibin  $\beta_A$  antibody (E4; 1:400 dilution), overnight at 4 C. Membranes were washed in TBS with

0.1% Tween 20 (and then incubated with biotinylated antimouse immunoglobulin and avidin-biotin peroxidase complex reagents (Vector Laboratories, Inc.) according to the manufacturer's instructions. Detection signal was developed using an enhanced chemiluminescence detection system (NEN Life Science Products) according to the manufacturer's directions. Biotin broad range protein molecular weight markers were used to determine the molecular weights, and Kaleidoscope polypeptide markers were used to monitor electrophoresis and Western transfer of proteins in the gel (Bio-Rad Laboratories, Inc.).

### Antibodies

Monoclonal antibodies to detect the  $\alpha$ -subunit and the  $\beta_A$ - and  $\beta_B$ -subunits of inhibin were obtained from Oxford Bio-innovation (Oxford, UK), and the monoclonal to follistatin obtained from R&D Systems, Inc. (Oxford, UK).

### In situ hybridization

This was performed using a fluorescent-labeled cDNA oligonucleotide probe directed against mRNA encoding the activin  $\beta_A$ - and  $\beta_B$ -subunits in sections of human uterine tubes. The complete cDNA sequences of the  $\beta_A$ -subunit (accession no. GI = 204936) and  $\beta_B$ -subunit (accession no. GI = 186422) were obtained from GenBank (NIH, Bethesda, MD). Human oligonucleotide probes complementary to the  $\beta_A$ - and  $\beta_B$ -subunits, comprising 30 nucleotides each, were obtained from (Cruachem Ltd., Glasgow, UK).

Sense probes specific for each of the subunits were used for control hybridizations, and in every experiment a negative control sample was included for each set of conditions tested. The *in situ* hybridization procedure was briefly as follows: 5  $\mu\text{m}$  formaldehyde-fixed sections were deparaffinized, rehydrated, and washed in  $4\times$  saline sodium citrate (SSC) solution and incubated at 37 C with pepsin (12.5  $\mu\text{g}/\text{ml}$  in 0.2 M HCl) for 20 min. The sections were then washed in diethylpyrocarbonate (Sigma, Poole, UK) water and prehybridized for 2 h at 37 C with the hybridization buffer without probe (10% polyvinylpyrrolidone,  $20\times$  SSC, 10% Ficoll, and 0.22 ml salmon sperm DNA). Hybridization was performed at 37 C overnight with a final probe concentration of 200–500 ng/ml. Sense probe and hybridization buffer without probe were used as negative controls. Sections were then washed in  $4\times$  and  $2\times$  SSC at 37 C for 5 min, and then incubated in normal sheep serum (1:5 dilution in TBS with 3% BSA and 0.1% Triton) added at room temperature for 20 min, followed by antiluorescein alkaline phosphatase-conjugated antibody (Roche Molecular Biochemicals, Mannheim, Germany) for 60 min at room temperature (1:200 dilution in TBS with 3% BSA and 0.1% Triton). Sections were visualized with BCIB-nitro blue tetrazolium mixture (Life Technologies, Inc., Uxbridge, UK). Sections were counterstained with methyl green, dehydrated, and mounted with piccolyte.

The sections were observed on a Labor Lux microscope (Leitz) at a magnification of  $\times 400$ . A positive reaction was characterized by the presence of nuclear purple staining. Representative sections were photographed using a Wild MPS 48/52 Photoautomat (Leica Corp.).

## Results

Uterine tubes were obtained from 11 premenopausal women (median age, 37 yr; range, 31–45 yr) and 5 postmenopausal women (median age, 59.5 yr; range, 55–65). Immunohistochemistry using a range of dilutions of antibody specific for the  $\alpha$ -subunit failed to demonstrate any positivity in any of the sections of the tube (5 or 1  $\mu\text{m}$ ) in either premenopausal (Fig. 1, A and B) or postmenopausal (Fig. 2, A and B) women. However, positive staining was observed in all tissue samples for the inhibin  $\beta_A$ - and  $\beta_B$ -subunits as well as follistatin (Tables 1 and 2).

In both premenopausal (Fig. 1, C and D) and postmenopausal (Fig. 2, C and D) groups, labeling of the 5- $\mu\text{m}$  sections with antibodies directed against the  $\beta_A$ -subunit resulted in the detection of immunoreactivity in both the ampulla (Fig. 2C) and



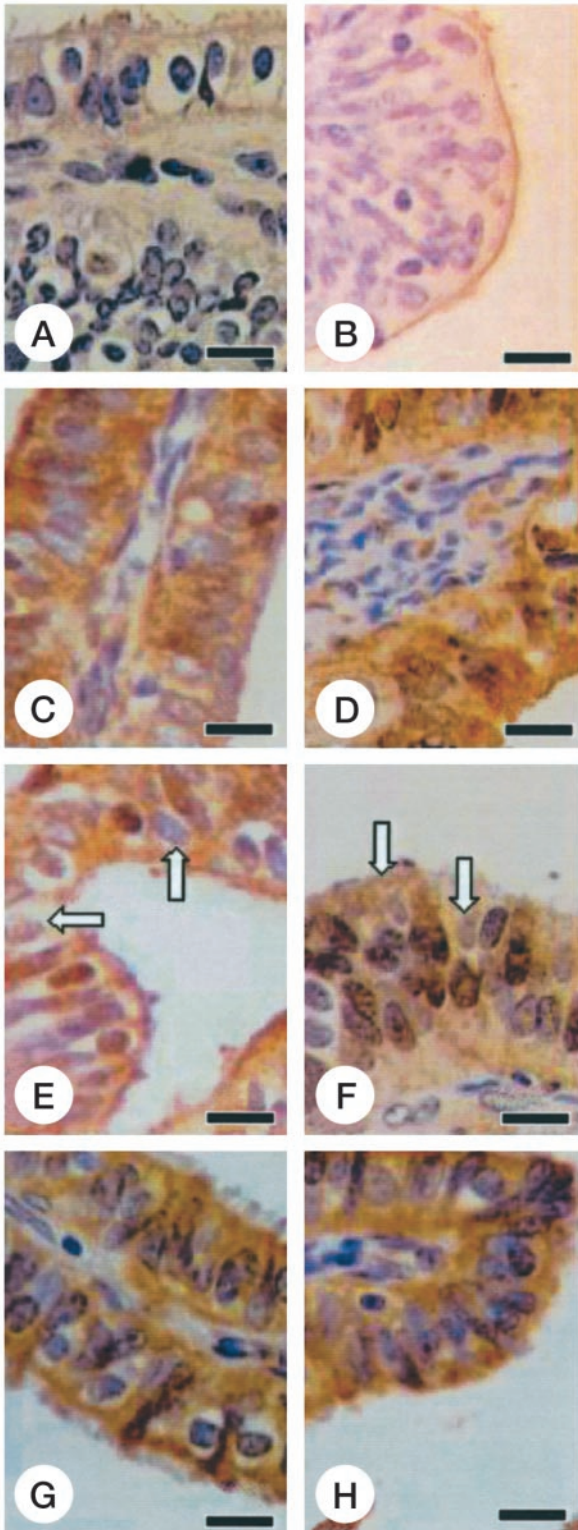

FIG. 1. Immunohistochemical localization of the  $\alpha$ -subunit (A and B), the  $\beta_A$ -subunit (C and D), the  $\beta_B$ -subunit (E and F), and follistatin (G and H) in the ampullary (*left series*) and isthmic (*right series*) regions of uterine tube sections from premenopausal women. No immunoreactivity was observed for the  $\alpha$ -subunit (A and B). However, staining was observed for  $\beta_A$ -subunit (C and D),  $\beta_B$ -subunit (E and F), and follistatin (E and F). All showed a similar pattern of staining, although with the  $\beta_B$ -subunit not all cells were stained (*arrow*). Scale bar, 20  $\mu$ m.

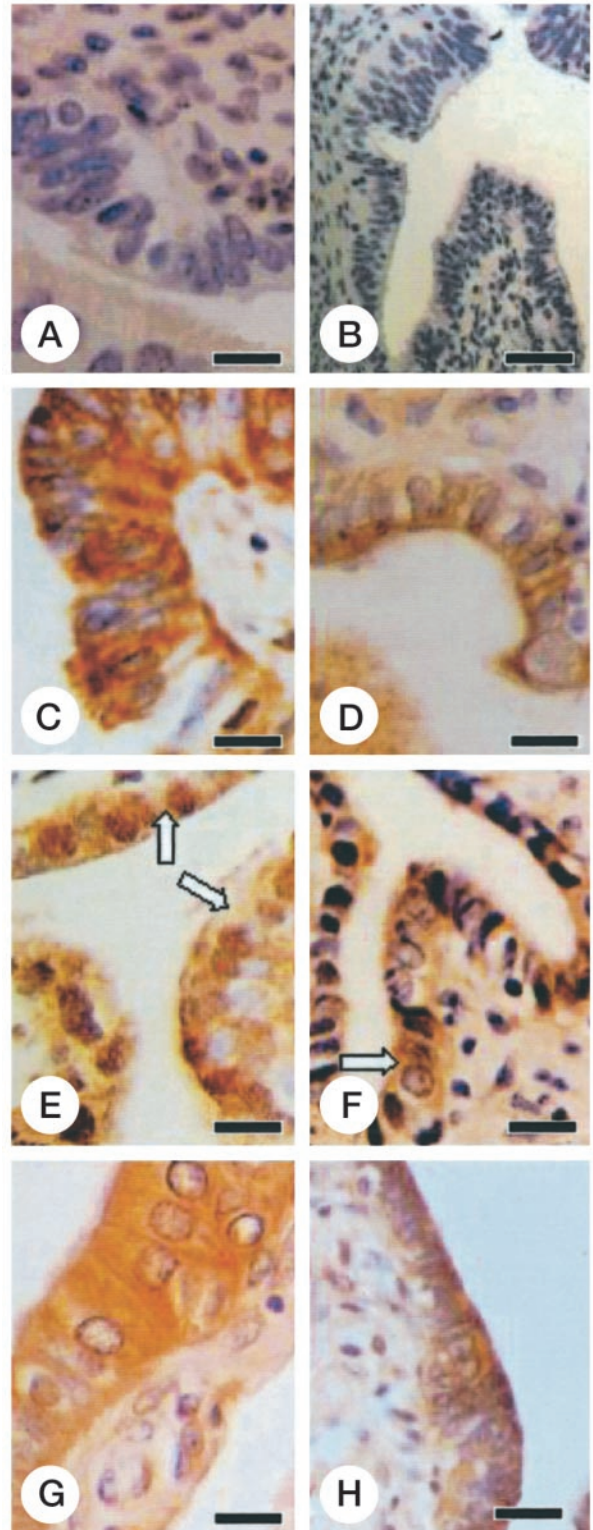

FIG. 2. Immunohistochemical localization of the  $\alpha$ -subunit (A and B), the  $\beta_A$ -subunit (C and D), the  $\beta_B$ -subunit (E and F), and follistatin (G and H) in the ampullary (*left series*) and isthmic (*right series*) regions of uterine tube sections from postmenopausal women. No immunoreactivity was observed for the  $\alpha$ -subunit. However, staining was observed for the  $\beta_A$ -subunit (C and D),  $\beta_B$ -subunit (E and F), and follistatin (E and F). All showed a similar pattern of staining, although with the  $\beta_B$ -subunit, not all cells were stained (*arrow*). Scale bar, 20  $\mu$ m.

**TABLE 1.** Summary of the intensity of immunohistochemical expression of inhibin  $\beta_A$ ,  $\beta_B$ , and follistatin in 22 premenopausal human uterine tubes

|                    | Patient number |     |    |     |     |     |     |     |     |     |     |    |
|--------------------|----------------|-----|----|-----|-----|-----|-----|-----|-----|-----|-----|----|
|                    | 01             | 02  | 03 | 04  | 05  | 06  | 07  | 08  | 09  | 10  | 11  |    |
| $\beta_A$ -Subunit |                |     |    |     |     |     |     |     |     |     |     |    |
| Ampulla            | +++            | +++ | ++ | +++ | +++ | +++ | +++ | +++ | +++ | +++ | +++ | ++ |
| Isthmus            | +              | +   | +  | +   | +   | +   | +   | +   | +   | +   | +   | +  |
| $\beta_B$ -Subunit |                |     |    |     |     |     |     |     |     |     |     |    |
| Ampulla            | ++             | ++  | ++ | ++  | ++  | ++  | ++  | ++  | ++  | ++  | ++  | ++ |
| Isthmus            | +              | +   | +  | +   | +   | +   | +   | +   | +   | +   | +   | +  |
| Follistatin        |                |     |    |     |     |     |     |     |     |     |     |    |
| Ampulla            | +++            | +++ | ++ | +++ | +++ | +++ | +++ | +++ | +++ | +++ | +++ | ++ |
| Isthmus            | +              | +   | +  | +   | +   | +   | +   | +   | +   | +   | +   | +  |

For each patient, both tubes were examined.

**TABLE 2.** Summary of the intensity of immunohistochemical expression of inhibition  $\beta_A$ ,  $\beta_B$ , and follistatin in 12 postmenopausal human uterine tubes

|                    | Patient number |    |    |    |    |    |
|--------------------|----------------|----|----|----|----|----|
|                    | 01             | 02 | 03 | 04 | 05 | 06 |
| $\beta_A$ -Subunit |                |    |    |    |    |    |
| Ampulla            | ++             | ++ | ++ | ++ | ++ | ++ |
| Isthmus            | +              | +  | +  | +  | +  | +  |
| $\beta_B$ -Subunit |                |    |    |    |    |    |
| Ampulla            | ++             | ++ | ++ | ++ | ++ | ++ |
| Isthmus            | +              | +  | +  | +  | +  | +  |
| Follistatin        |                |    |    |    |    |    |
| Ampulla            | ++             | ++ | +  | ++ | ++ | ++ |
| Isthmus            | +              | +  | +  | +  | +  | +  |

For each patient, both tubes were examined.

isthmus (Fig. 2D). The antibody clearly labeled the cytoplasm and nucleus of the epithelial cells, with the intensity of staining decreasing toward the isthmic region (Tables 1 and 2). Staining intensity for the  $\beta_B$ -subunit in premenopausal (Fig. 1, E and F) and postmenopausal (Fig. 2, E and F) women showed a similar localization to the  $\beta_A$ -subunit (see also Tables 1 and 2). Of particular interest was the pattern of expression observed, where some of the columnar epithelial cells showed nuclear localization of  $\beta_B$ -subunit, whereas adjacent cells of similar morphology sometimes displayed no localization (see *arrow* in Fig. 2). To further characterize the nuclear localization of the  $\beta_A$ - and  $\beta_B$ -subunits, 1- $\mu$ m sections were cut and immunostained with the respective antibody (data not shown). This confirmed that not all of the epithelial cells were stained for these subunits, and in the majority of cases this staining was nuclear.

Immunoreactivity for follistatin was detected in the cytoplasm of epithelial cells from both premenopausal (Fig. 1, G and H) and postmenopausal (Fig. 2, G and H) women. Immunoreactivity appeared most strongly positive in the ampullary region of the tube and decreased toward the isthmus in both premenopausal (Table 1) and postmenopausal (Table 2) women.

#### Immunoblot analysis

One form of protein, with an apparent molecular mass of 28 kDa, was present in the rat ovary (positive control) and the human uterine tube (Fig. 3, *arrow A*) when examined under reducing conditions. A further band of approximately 60 kDa

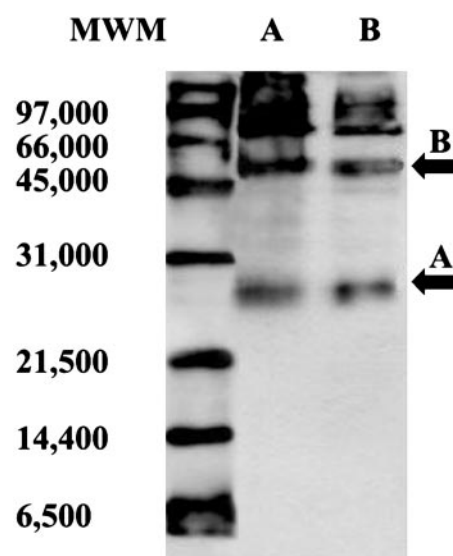

**FIG. 3.** Western blot of proteins from the rat ovary (lane A) and human uterine tube (lane B) separated by SDS-PAGE under reducing conditions. Both tissues show two major forms of immunoreactive protein at 28 and 60 kDa; they correspond to the activin dimer and the pro-protein, respectively. The high molecular mass protein of about 70 kDa may be another form of the pro-protein of  $\beta_A$ -subunits.

(Fig. 3, *arrow B*) and other of 70 kDa or greater were also detected in both samples at varying density. Under nonreducing conditions no bands were detected (data not shown).

#### In situ hybridization

Figures 4 and 5 show the results of *in situ* hybridization of premenopausal uterine tube tissue and related controls for the  $\beta_A$ -subunit (Fig. 4) and  $\beta_B$ -subunit (Fig. 5). In both cases, positive staining, shown by a purple color (indicating the presence of mRNA), was associated with the tubal epithelial nuclei (Figs. 4E and 5E). Two-week-old rat testis was used as a positive control tissue for the  $\beta_A$ -subunit (Fig. 4A), and human epididymal tissue was used as a positive control for the  $\beta_B$ -subunit (Fig. 5A). For both subunits, staining was absent in the negative controls (Figs. 4, B and D, and 5, B and D). A poly(deoxythymidine)oligonucleotide probe was used to monitor the sample preparation, and in both cases was positive (Figs. 4C and 5C).



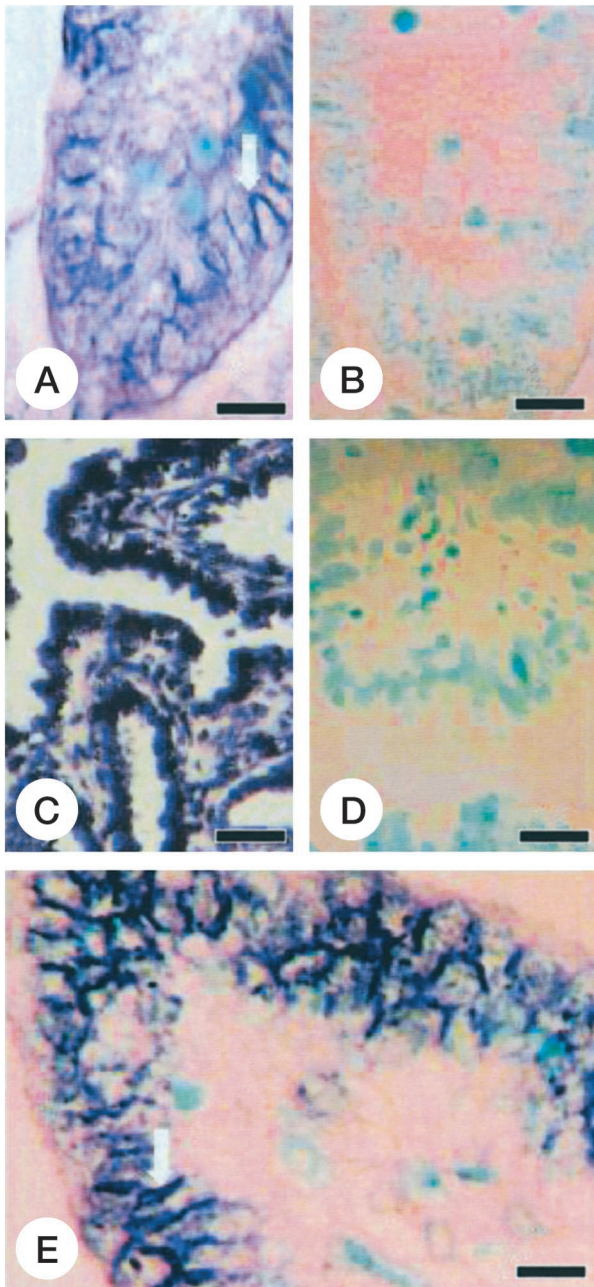

FIG. 4. Localization of activin  $\beta_A$  mRNA in tissue sections of uterine tubes from premenopausal women showing mRNA localization in the nucleus of epithelial cells. A, Rat testis incubated with antisense probe for  $\beta_A$ -subunit (positive control); B, rat testis incubated with sense probe (negative control); C, human uterine tube incubated with poly(deoxythymidine)oligonucleotide probe; D, human uterine tube incubated with hybridization buffer; E, human uterine tube incubated with antisense probe for  $\beta_A$ -subunit. Scale bar, 17  $\mu\text{m}$  for A, B, and D; 4  $\mu\text{m}$  for C; and 12.5  $\mu\text{m}$  for E. Positive staining is shown in purple.

### Discussion

Inhibin and activin are classically involved in the regulation of FSH secretion (1). However, more recently they and other members of the TGF $\beta$  superfamily have been implicated in paracrine and autocrine regulation of cellular function in the gonad. To date, several studies have demonstrated

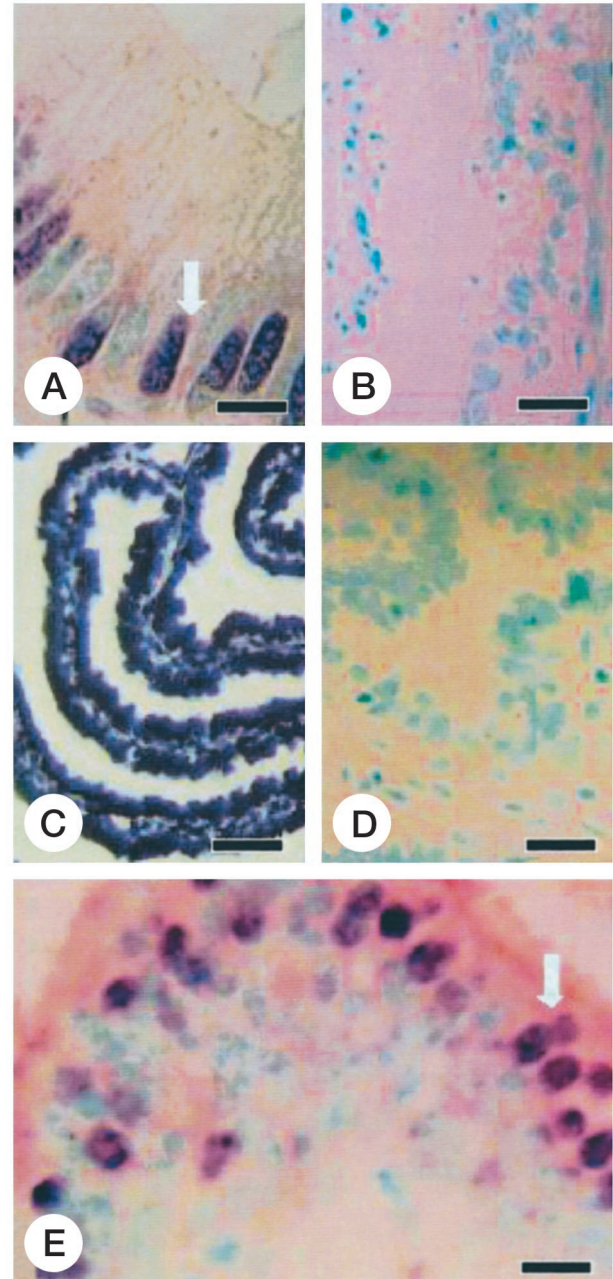

FIG. 5. Localization of activin  $\beta_B$  mRNA in tissue sections of uterine tubes from premenopausal women showing mRNA localization in the nucleus of epithelial cells. Human epididymis incubated with antisense probe for  $\beta_A$ -subunit (A; positive control), human epididymis incubated with sense probe (B; negative control), human uterine tube incubated with poly(deoxythymidine)oligonucleotide probe (C), human uterine tube incubated with hybridization buffer (D), and human uterine tube incubated with antisense probe for  $\beta_B$ -subunit (E). Scale bar, 17  $\mu\text{m}$  for A, B, and D; 4  $\mu\text{m}$  for C; and 12.5  $\mu\text{m}$  for E. Positive staining is shown in purple.

synthesis of inhibins and activins in the fetal gonads of rats, chickens, cows, sheep, subhuman primates, and humans (25, 26). This study is the first to identify the presence of inhibin/activin  $\beta$ -subunits in the epithelium of the human uterine tube (the endosalpinx). We were not able to detect the pres-

ence of  $\alpha$ -subunit of inhibin, suggesting that the endosalpinx may synthesize activins, not inhibins.

The data presented here demonstrate localization of the activin subunits and follistatin to the epithelium of both isthmus and ampulla. The intracellular localization of the  $\beta_B$ -subunit was particularly unusual, with adjacent epithelial cells appearing to show extreme variation in the level of expression, with intense nuclear staining in one cell and none in the next. This demonstrates a functional pleiomorphism within morphologically similar epithelial cells. In contrast, the majority of immunoreactions for  $\beta_A$ -subunit were seen in cytoplasm, although nuclear staining was also detected. Again, only a proportion of epithelial cells appeared to exhibit positive nuclear staining. Follistatin immunoreaction was restricted to the epithelial cytoplasm.

The intensity of staining for both subunits (and follistatin) was greatest in the ampullary region of the tube. However, in all tissues studied, the  $\beta_A$ - and  $\beta_B$ -subunits were coexpressed with follistatin, the binding protein of activin (2), suggesting that the activin dimer has a local paracrine or autocrine role. Fertilization and the earliest stages of embryo development occur in the tubal ampulla, and it is possible that activin derived from the endosalpinx may participate in this process. A number of studies report a role for activin in early embryo development. The mRNAs for the activin  $\beta_A$ -subunits, follistatins, and activin type I and type II receptors are expressed in bovine oocyte and embryos from immature oocyte to hatched blastocysts (27). Sidis *et al.* (15) and recently Ying *et al.* (18) demonstrated that early mouse and human embryos, from four-cell to morula stage, were unable to synthesize activin, as no mRNA for these proteins was detected; activins that bind to the activin receptor I and activin receptor II on the preimplantation embryo may originate from surrounding tissue, such as the uterine tube; and oocytes are capable of receiving an activin signal emitted by surrounding cumulus cells, but not of transmitting one. Other studies show that follistatin mRNA is expressed early in the gastrula stage of *Xenopus* embryos (28) and in peri- and postimplantation mouse blastocysts (15). Also in humans, the expression of  $\beta_A$ -subunit, activin receptor I and follistatin was hardly detectable in preimplantation embryos before the morula stage, but noticeably increased at the blastocyst stage, indicating that the expression of  $\beta_A$ -subunit activin receptor I and follistatin was dependent on embryonic developmental stage (18). Mouse embryos have been shown to produce activins, but not inhibins (27).

Immunohistochemistry results alone do not provide evidence that the  $\beta_A$ - and  $\beta_B$ -subunits are synthesized by the endosalpinx. To investigate this we performed *in situ* hybridization using the same tissue samples. The results of these experiments provide evidence that activin subunits are synthesized by the endosalpinx. Immunoblotting with antibodies directed against the  $\beta_A$ -subunit under reducing conditions indicates the presence of a 28-kDa protein. This would be equivalent to mature activin. The appearance of the 28-kDa band under reducing conditions might be due to the release of mature activin from follistatin-binding protein. This phenomenon has previously been reported by Rabinovici *et al.* (29) and Klein *et al.* (30). Given the specificity of the monoclonal antibodies to the  $\beta$ -subunits, we doubt

that the 28-kDa band represents another protein and propose that the three-dimensional configuration of the activin molecule around the disulfide bonds may impart unusual strength to the adhesion between subunits.

Follistatin has a high affinity for activin under physiological conditions, but activin can be released from binding either through proteolytic action or after a change in follistatin configuration. Either or both of these events may be achieved under reducing conditions (31). Under nonreducing conditions, no free activin A was detected, possibly due to failure of the  $\beta$ -subunit antibody to recognize activin/follistatin complexes (32). A recent study by Klein *et al.* (30) has demonstrated that free inhibin can be detected under reducing conditions, and that the detected 32-kDa inhibin did not reduce further to its  $\alpha$ - and  $\beta$ -subunits. Immunoblotting with  $\beta_A$ -subunit antibodies also shows a high molecular mass band of about 70 kDa. This may be a form of pro- $\beta_A$  resulting from variable proteolytic processing of the  $\beta$ -subunit pro-sequence (pro- $\beta_A$ ) at the surface of the endosalpinx.  $\beta$ -Precursors are known to dimerize with other  $\beta$ -precursors or mature  $\beta_A$ -subunit forms to produce a number of high molecular mass activin molecules (33).

The detection of positive staining for activin subunits and follistatin in the uterine tubes from postmenopausal women is intriguing. Activin secreted from the endosalpinx of postmenopausal women may exert a paracrine/autocrine effect within the uterine tube itself. This suggestion is in agreement with the findings of Menon *et al.* (34), who showed that postmenopausal women have measurable concentrations of activin A, but not inhibin, in the circulation. During perimenopause, decreasing levels of estradiol and inhibin reduce negative feedback inhibition on the hypothalamo-pituitary axis, producing a concomitant rise in FSH secretion into the bloodstream (35–37). At menopause, ovarian inhibin production ceases, and circulatory inhibin becomes undetectable. Small amounts of estradiol, originating from nonovarian sources, remain detectable in the circulation. Taken together, our findings in postmenopausal women show that activin, but not inhibin, is expressed by the endosalpinx, and that significant levels of activin A, but not follistatin, in the postmenopausal circulation may be involved in paracrine/autocrine functions within the uterine tube itself.

### Acknowledgments

We acknowledge the help of Dr. M. Tomsu and colleagues at the Royal Hallamshire Hospital in collection of samples, and D. Swain for production of the manuscript.

Received November 28, 2001. Accepted August 7, 2002.

Address all correspondence and requests for reprints to: Dr. W. L. Ledger, Section of Reproductive and Developmental Medicine, University of Sheffield, Level 4, The Jessop Wing, Royal Hallamshire Hospital, Sheffield, United Kingdom S10 2SF.

### References

- Robertson DM, Herten R, Farnworth PG 2000 Is the action of inhibin mediated via a unique receptor? *Rev Reprod* 5:131–135
- Woodruff TK 1998 Regulation of cellular and system function by activin. *Biochem Pharmacol* 55:953–963
- Gray PC, Bilezikjian L, Vale W 2001 Antagonism of activin by inhibin receptors: a functional role for betaglycan-glycan. *Mol Cell Endocrinol* 180:47–53



4. Bernard D, Chapman SC, Woodruff T 2001 An emerging role for co-receptors in inhibin signal transduction. *Mol Cell Endocrinol* 180:55–62
5. Boitani C, Stefanini M, Fragale A 1995 Activin stimulates Sertoli cell proliferation in a defined period of rat testis development. *Endocrinology* 136:5438–5444
6. Findlay JK 1993 An update on the roles of inhibin, activin and follistatin as local regulators of folliculogenesis. *Biol Reprod* 48:15–23
7. Roberts VJ, Sawchenko PE, Vale W 1995 Expression of inhibin/activin subunit mRNAs during rat embryogenesis. *Endocrinology* 128:3122–3129
8. Yoshioka K, Takata T, Taniguchi T, Yamanaka H, Sekikawa K 1998 Differential expression of activin subunits, activin receptors and follistatin genes in bovine oocytes and preimplantation embryos. *Reprod Fertil Dev* 10:293–298
9. Silva CC, Knight PG 1998 Modulatory actions of activin A and follistatin on the developmental competence of in vitro-matured bovine oocytes. *Biol Reprod* 58:558–565
10. Albano RM, Groome N, Smith JC 1993 Activins are expressed in preimplantation mouse embryos and in ES and EC cells and are regulated on their differentiation. *Development* 117:711–723
11. Yoshioka K, Kamomae H 1996 Recombinant human activin A stimulates development of bovine one-cell embryos matured and fertilized in vitro. *Mol Reprod Dev* 45:151–156
12. Torney AH, Robertson DM, Hodgson YV, de Kretser DM 1990 *In vitro* bioactive and immunoactive inhibin concentrations in bovine fetal ovaries and testes throughout gestation. *Endocrinology* 127:2938–2946
13. Wongprasartsuk S, Jenkin G, McFarlane JR, Goodman M, de Kretser DM 1994 Inhibin and follistatin concentrations in fetal tissue and fluids during gestation in sheep: evidence for activin in amniotic fluid. *J Endocrinol* 141:219–229
14. Lu RZ, Matsuyama S, Nishihara M, Takahashi M 1993 Developmental expression of activin/inhibin  $\beta$ A,  $\beta$ B and  $\alpha$ -subunit and activin receptor II B genes in preimplantation mouse embryos. *Biol Reprod* 49:1163–1169
15. Sidis Y, Fujiwara T, Leykin L, Isaacson K, Toth T, Schneyer AL 1998 Characterization of inhibin/activin subunit, activin receptor, and follistatin messenger ribonucleic acid in human and mouse oocytes: evidence for activin's paracrine signalling from granulosa cells to oocytes. *Biol Reprod* 59:807–812
16. Jarred RA, Cancilla B, Richards M, Groome NP, McNatty KP, Risbridger GP 1999 Differential localization of inhibin subunit proteins in the ovine testis during fetal gonadal development. *Endocrinology* 140:979–986
17. Roberts V, Barth S, El-Roeiy A, Yen SA 1993 Expression of inhibin/activin subunits and follistatin messenger ribonucleic acids and proteins in ovarian follicles and the corpus luteum during the human menstrual cycle. *J Clin Endocrinol Metab* 77:1402–1410
18. Ying HE, Hung-Ching LIU, Mele CA, Barmat L, Veeck LL, Davis O, Rosenwaks Z 1999 Expression of inhibin/activin subunits and their receptors and binding proteins in human preimplantation embryos. *J Assist Reprod Gen* 16:73–80
19. Gandolfi F, Modina S, Brevini TA, Passoni L, Artini P, Petraglia F, Lauria A 1995 Activin  $\beta$ A subunit is expressed in bovine oviduct. *Mol Reprod Dev* 40:286–291
20. Phadke AM, Garde SV, Sheth AR 1991 Occurrence of bioactive and immunoreactive inhibin (13kD) in human epididymis. *Anat Rec* 230:468–472
21. Gandolfi F, Brevini TAL, Modina S, Passoni L, Varga Z, Lauria A 1992 Embryonic development in the oviduct: role of growth factors. In: Gennazzani AR, Petraglia F, eds. *Hormones in gynaecological endocrinology*. Canforth: Parthenon; 401–408
22. Pacey AA, Hill CJ, Scudamore IW, Warren MA, Barratt CLR, Cooke ID 1995 The interaction of human spermatozoa with epithelial cells from the human female uterine tube *in vitro*. *Hum Reprod* 10:360–366
23. Gordon KC 1991 Theory and practice of histological techniques. London: Churchill Livingstone; 43–59
24. Streefkerk JG 1972 Inhibition of erythrocyte pseudoperoxidase activity by treatment with hydrogen peroxide following methanol. *J Histochem Cytochem* 20:829–830
25. Alberts N, Hart CS, Kaplan SL, Grumbach MM 1989 Hormone ontogeny in the ovine fetus. XXIV. porcine follicular fluid “inhibins” selectively suppress plasma follicle-estimating hormone in the ovine fetus. *Endocrinology* 125:675–678
26. Wongprasartsuk S, Jenkin G, McFarlane JR, Goodman M, de Kretser DM 1994 Inhibin and follistatin concentrations in fetal tissues and fluids during gestation in sheep: evidence for activin in amniotic fluid. *J Endocrinol* 141:219–229
27. Yoshioka K, Takata M, Taniguchi T, Yamanaka H, Sekikawa K 1998 Differential expression of activin subunits, activin receptors and follistatin genes in bovine oocytes and preimplantation embryos. *Reprod Fertil Dev* 10:293–298
28. Thomsen G, Woolf T, Whitman M, Sokol S, Vaughan J, Vale W, Melton DA 1990 Activins are expressed early in *Xenopus* embryogenesis and can induce axial mesoderm and anterior structure. *Cell* 63:485–493
29. Rabinovici J, Spencer SJ, Doldi N, Goldsmith PC, Schwall R, Jaffe RB 1992 Activin-A as an intraovarian modulator: actions, localisation, and regulation of the intact dimer in human ovarian cells. *J Clin Invest* 89:1528–1536
30. Klein NA, Battaglia DA, Woodruff TA, Padmanabhan V, Giudice LC, Bremner WJ, Soules MR 2000 Ovarian follicular concentrations of activin, follistatin, inhibin, insulin-like growth factor I (IGF-I), IGF-II, IGF-binding protein-2 (IGFBP-2), IGFBP-3, and vascular endothelial growth factor in spontaneous menstrual cycles of normal women of advanced reproductive age. *J Clin Endocrinol Metab* 85:4520–4525
31. Nakamura T, Sugino K, Titani K, Sugino H 1991 Follistatin, an activin binding protein, associates with heparan sulfate chains of proteoglycans on follicular granulosa cells. *J Biol Chem* 266:19432–19437
32. Schneyer AL, Rzucidlo DA, Sluss PM, Crowley WF 1994 Characterization of unique binding kinetics of follistatin and activin or inhibin in serum. *Endocrinology* 135:667–674
33. Mason AJ, Farnworth PG, Sullivan J 1996 Characterization and determination of the biological activities of noncleavable high molecular weight forms of inhibin A and activin A. *Mol Endocrinol* 10:1055–1065
34. Menon U, Riley SC, Thomas J, Bose C, Dawnay A, Evans LW, Groome NP, Jacobs IJ 2000 Serum inhibin, activin and follistatin in postmenopausal women with epithelial ovarian carcinoma. *Br J Obstet Gynaecol* 107:1069–1074
35. Burger HG, Cahir N, Robertson DM, Groome NP, Dudley E, Green A, Dennerstein L 1998 Serum inhibin A and B fall differentially as FSH rises in perimenopausal women. *Clin Endocrinol (Oxf)* 48:809–813
36. Santoro N, Adel T and Skurnick JH 1999 Decreased inhibin tone and increased activin A secretion characterize reproductive aging in women. *Fertil Steril* 71:658–662
37. Muttukrishna S, Child T, Lockwood GM, Groome NP, Barlow DH, Ledger WL 2000 Serum concentrations of dimeric inhibins, activin A, gonadotrophins and ovarian steroids during the menstrual cycle in older women. *Hum Reprod* 15:549–556
